# Supplementary material
Source: PubMed Central journal article supplement (PMC4958187)
Supplement: AAC.00753-16_zac008165357so1.pdf [file AAC.00753-16_zac008165357so1.pdf]

1

2 **Figure S1.** Map of the plasmid used for complementing the B5 mutant.

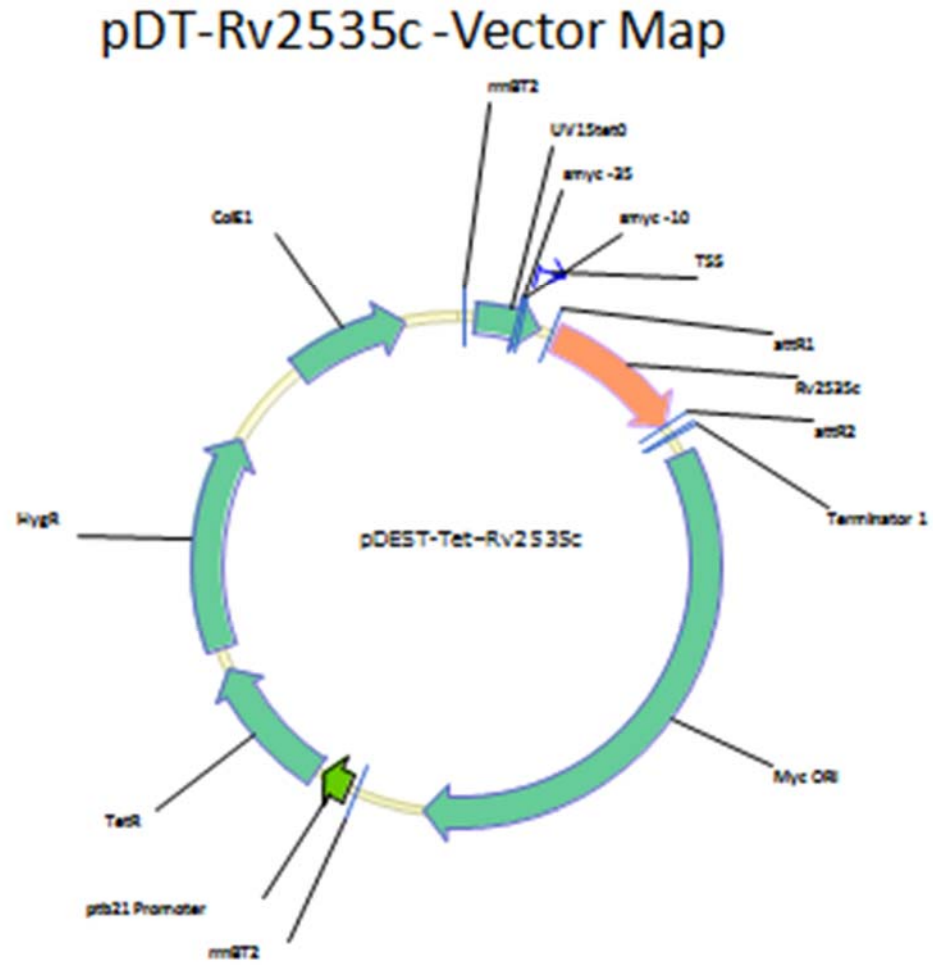

3

4 **Figure S2.** Lung lesions observed at the end of 4 weeks of treatment from mice infected with the H37Rv parent strain, the *pepQ*  
5 mutant (B5), or the complemented B5:*pepQ* strain. Abbreviations: UT, untreated; INH, isoniazid; BDQ, bedaquiline; CFZ,  
6 clofazimine.

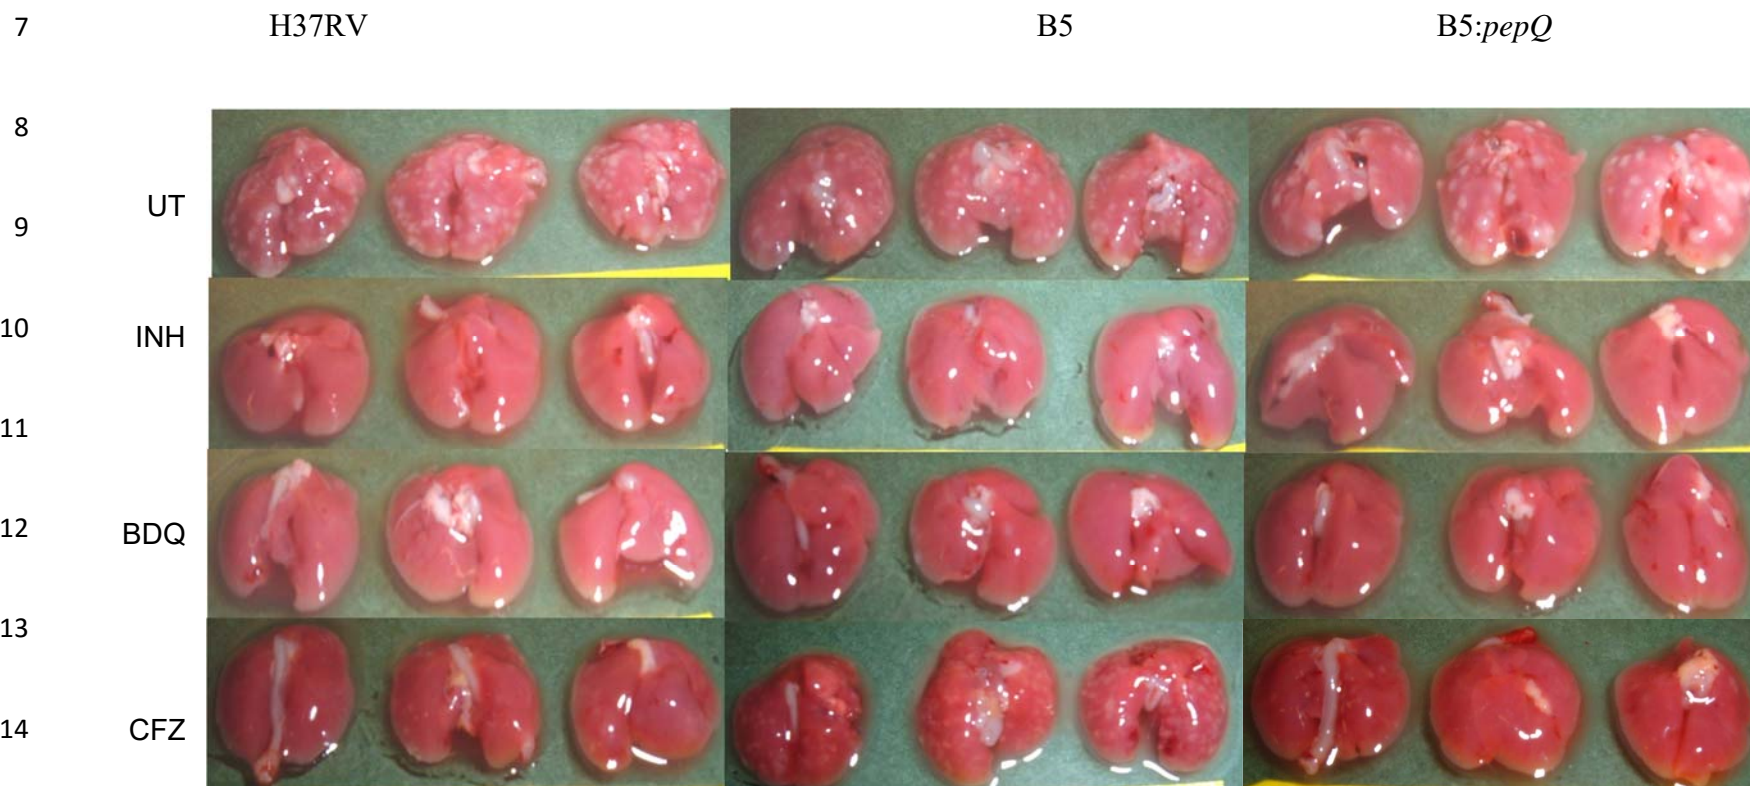

15

16

17 **Table S1.** Primers used in the study.

|                |                | <b>Primer 1</b>         | <b>Primer 2</b>            |
|----------------|----------------|-------------------------|----------------------------|
| <i>pepQ</i>    | <i>Rv2535c</i> | ATC AAT GCC CCC TGG AAC | GCA CGT TCT TCA ACT TGG TG |
| <i>mmpL5</i>   | <i>Rv0676c</i> | TGATCAACAAGATCGCCAAG    | TGAATGTCGTTGACCTGCTC       |
| <i>mmpS5</i>   | <i>Rv0677c</i> | GGATACCGCTGCTCATCCT     | CGTCGAGGTCCAGGTAGTTG       |
| -              | <i>Rv0678</i>  | TCATGGAATTCGTCGAACAG    | ACCCAAATTGGATCAGCATC       |
| <i>16srRNA</i> |                | CCTGGGAAACTGGGTCTAATAC  | CTCATCCCACACCGCTAAAG       |

18

19

20

21

22

23

24 **Table S2.** MIC of bedaquiline alone and in the presence of verapamil and reserpine against the H37Rv parent strain and the B5 mutant  
25 using the broth macrodilution method.

|              | <b>MIC in <math>\mu\text{g/ml}</math></b> |              |              |
|--------------|-------------------------------------------|--------------|--------------|
|              | <b>7H9</b>                                | <b>7H9+V</b> | <b>7H9+R</b> |
| <b>H37Rv</b> | 0.03                                      | 0.007        | 0.015-0.03   |
| <b>B5</b>    | 0.12                                      | 0.0035       | 0.015-0.03   |

26 V = verapamil 40  $\mu\text{g/ml}$

27 R = reserpine 3  $\mu\text{g/ml}$

28

29

30

31

32

33

34

35 **Table S3.** Expression of *Rv0676-Rv0678* in the B5 mutant strain.

| <b>Rv number</b> | <b>Gene</b>  | <b>Description</b>                                       | <b>Fold change (B5/H37Rv) with BDQ</b> | <b>Fold change (B5/H37Rv) without BDQ</b> |
|------------------|--------------|----------------------------------------------------------|----------------------------------------|-------------------------------------------|
| Rv0676c          | <i>mmpL5</i> | Probable conserved transmembrane transport protein MmpL5 | 0.77                                   | 1.06                                      |
| Rv0677c          | <i>mmpS5</i> | Possible conserved membrane protein MmpS5                | 0.89                                   | 0.99                                      |
| Rv0678           |              |                                                          | 0.65                                   | 0.83                                      |

36

37

38

39

40
